# Supplementary material
Source: ML conference proceedings conference paper supplement (https://proceedings.mlr.press/v70/kallus17a.html)
Supplement: Supplementary file [file kallus17a-supp.pdf]

---

## Supplementary Material for: Recursive Partitioning for Personalization using Observational Data

---

Nathan Kallus<sup>1</sup>

### Omitted Proofs

*Proof of Theorem 1.* By Asn. 1, we have

$$\begin{aligned}
 \mathbb{E}[Y \mid X = x, T = t] &= \mathbb{E}[Y(T) \mid X = x, T = t] && \text{(definition of } Y = Y(T)\text{)} \\
 &= \mathbb{E}[Y(t) \mid X = x, T = t] && \text{(conditioned on } T = t\text{)} \\
 &= \mathbb{E}[Y(t) \mid X = x] && \text{(Asn. 1).}
 \end{aligned}$$

Consider a realization of the data and  $X = x$  where convergence occurs for all  $t \in [m]$ . Let

$$\epsilon(x) = \inf\{\zeta : s \in [m], \zeta = (\mathbb{E}[Y \mid X = x, T = s] - \min_{t \in [m]} \mathbb{E}[Y \mid X = x, T = t]) > 0\},$$

where  $\inf(\emptyset) = \infty$ . By assumption of convergence at this realization of the data and  $X = x$ , we have that eventually for all  $t \in [m]$ ,  $|\hat{\mu}_{t, n_t}(x) - \mathbb{E}[Y \mid X = x, T = t]| < \epsilon(x)/2$ , at which point we must necessarily also have  $\hat{\tau}_n(x) \in \arg \min_{t \in [m]} \mathbb{E}[Y \mid X = x, T = t] = \arg \min_{t \in [m]} \mathbb{E}[Y(t) \mid X = x]$ . By assumption of pointwise consistency and because the intersection of finitely many a.s. events is a.s., the set of such realization of the data and  $X = x$  have probability 1.  $\square$

*Proof of Theorem 2.* First note that, given any  $x$  with  $\mathbb{P}(T = t \mid X = x) > 0$ , we have

$$\mathbb{E}[Y \mid X = x, T = t] = \frac{\mathbb{E}[Y \mathbb{I}[T=t] \mid X=x]}{\mathbb{P}(T=t \mid X=x)} = \mathbb{E}\left[\frac{Y \mathbb{I}[T=t]}{\phi(t, x)} \mid X = x\right] = \mathbb{E}\left[\frac{Y \mathbb{I}[T=t]}{\phi(T, X)} \mid X = x\right] = \mathbb{E}\left[\frac{Y \mathbb{I}[T=t]}{Q} \mid X = x\right].$$

Therefore, since  $\mathbb{P}(T = t \mid X) > 0$  almost surely,

$$\begin{aligned}
 R(\tau) &= \mathbb{E}[Y(\tau(X))] = \mathbb{E}[\mathbb{E}[Y(\tau(X)) \mid X]] && \text{(iterated expectations)} \\
 &= \mathbb{E}[\mathbb{E}[Y(\tau(X)) \mid X, T = \tau(X)]] && \text{(Asn. 1)} \\
 &= \mathbb{E}[\mathbb{E}[Y \mid X, T = \tau(X)]] && \text{(definition of } Y\text{)} \\
 &= \mathbb{E}[\mathbb{E}[Y \mathbb{I}[T = \tau(X)]/Q \mid X]] && \text{(above observation)} \\
 &= \mathbb{E}[Y \mathbb{I}[T = \tau(X)]/Q] && \text{(iterated expectations).} \quad \square
 \end{aligned}$$

*Proof of Theorem 4.* We start with 1vA. Restrict to  $x$  such that  $\phi(s, x) > 0 \forall s$  (almost everywhere). Let  $\mu(t, x) = \mathbb{E}[Y(t) \mid X = x]$ . Under Asn. 1,

$$\begin{aligned}
 \delta^{tvA}(x) &= \mathbb{E}[Y \mid X = x, T = t] - \mathbb{E}[Y \mid X = x, T \neq t] \\
 &= \mathbb{E}[Y \mid X = x, T = t] - \sum_{s \neq t} \mathbb{E}[Y \mid X = x, T = s] \mathbb{P}(T = s \mid X = x, T \neq t) \\
 &= \mu(t, x) - \sum_{s \neq t} \phi(s, x) \mu(s, x) / \sum_{s \neq t} \phi(s, x).
 \end{aligned}$$

---

<sup>1</sup>School of Operations Research and Information Engineering and Cornell Tech, Cornell University. Correspondence to: Nathan Kallus <kallus@cornell.edu>.

Since  $\phi(s, x) > 0$ , it's clear that  $\delta^{tvA}(x) \leq \delta^{svA}(x) \forall s$  if and only if  $\mu(t, x) \leq \mu(s, x) \forall s$ . The rest of the proof for 1vA follows the same way as Thm. 1, showing that, under the assumption of pointwise consistent estimation, the estimation gap  $\sup_{t \in [m]} \left| \hat{\delta}_n^{tvA}(x) - \delta^{tvA}(x) \right|$  is eventually smaller than half the decision gap,  $\epsilon^{1vA}(x) = \inf\{\zeta : s \in [m], \zeta = (\delta^{svA}(x) - \min_{t \in [m]} \delta^{tvA}(x)) > 0\}$ , a.s. and for almost everywhere  $x$ .

Next, we deal with 1v1-A. Fix  $x$ . Fix any  $t_m \in \arg \max_{t \in [m]} \mu(t, x)$ . Let  $\delta^{tv\min}(x) = \min_{s \neq t} \delta^{tvs}(x)$ . If  $t, s \neq t_m$ , then  $\delta^{tv\min}(x) - \delta^{sv\min}(x) = \mu(t, x) - \mu(s, x)$ . On the other hand, for any  $t \in [m]$ , we always have both  $\mu(t, x) - \mu(t_m, x) \leq 0$  and  $\delta^{tv\min}(x) - \delta^{t_m v\min}(x) \leq 0$ . Therefore, we have

$$\begin{aligned} t \in \arg \min_{t \in [m]} \mu(t, x) &\iff \mu(t, x) - \mu(s, x) \leq 0 \forall s \neq t \iff \mu(t, x) - \mu(s, x) \leq 0 \forall s \neq t, t_m \\ &\iff \delta^{tv\min}(x) - \delta^{sv\min}(x) \leq 0 \forall s \neq t, t_m \iff \delta^{tv\min}(x) - \delta^{sv\min}(x) \leq 0 \forall s \neq t \\ &\iff t \in \arg \min_{t \in [m]} \delta^{tv\min}(x). \end{aligned}$$

Let  $\hat{\delta}_n^{tv\min}(x) = \min_{s \neq t} \hat{\delta}_{n_t+n_s}^{tvs}(x)$  and note that  $\sup_{t \in [m]} \left| \hat{\delta}_n^{tv\min}(x) - \delta^{tv\min}(x) \right| \leq \sup_{t \in [m], s \in [m]} \left| \hat{\delta}_{n_t+n_s}^{tvs}(x) - \delta^{tvs}(x) \right|$ , which converges to zero under pointwise consistency. The rest of the proof for 1v1-A follows as above, showing that this estimation gap is eventually smaller than half the decision gap,  $\epsilon^{1v1-A}(x) = \inf\{\zeta : s \in [m], \zeta = (\delta^{sv\min}(x) - \min_{t \in [m]} \delta^{tv\min}(x)) > 0\}$ , a.s. and for almost everywhere  $x$ .

Next, we deal with 1v1-B. Fix  $x$  and a realization of the data where convergence holds for all  $t \neq s$ . Then, eventually  $\left| \hat{\delta}_{n_t+n_s}^{tvs}(x) - \delta^{tvs}(x) \right| \leq |\delta^{tvs}(x)|/2$  for all  $t \neq s$  such that  $\delta^{tvs}(x) \neq 0$ . That is, eventually  $\mathbb{I} \left[ \hat{\delta}_{n_t+n_s}^{tvs}(x) < 0 \right] = \mathbb{I} [\delta^{tvs}(x) < 0]$  for all  $t \neq s$  such that  $\delta^{tvs}(x) \neq 0$ . Restrict to such large enough  $n$ . Let  $k_t(x) = \sum_{t \neq s} \mathbb{I} [\delta^{tvs}(x) < 0]$ ,  $\hat{k}_t(x) = \sum_{t \neq s} \mathbb{I} \left[ \hat{\delta}_{n_t+n_s}^{tvs}(x) < 0 \right]$ , and  $k_{\min}(x) = |\arg \min_{t \in [m]} \mu(t, x)|$ . Then,  $t \in \arg \min_{t \in [m]} \mu(t, x) \iff k_t(x) = m - k_{\min}(x) \iff \hat{k}_t(x) \geq m - k_{\min}(x) \iff t \in \arg \max_{t \in [m]} \sum_{s \neq t} \mathbb{I} \left[ \hat{\delta}_{n_t+n_s}^{tvs}(x) < 0 \right]$ .  $\square$

*Proof of Theorem 5.* By random sampling,  $(X_{i_j}, T_{i_j}, Y_{i_j}(1), \dots, Y_{i_j}(m))$  are distributed iid as  $(X, T, Y(1), \dots, Y(m))$  is in population. For  $j \in [n_{\text{test}}]$ , let  $i_{jt}$  be  $i_j$ 's match for treatment  $t$ , or  $i_j$  if  $T_{i_j} = t$ . Under exact matching,  $Y_{i_{jt}}(1), \dots, Y_{i_{jt}}(m) \mid X_{i_j}$  is distributed the same as  $Y_{i_j}(1), \dots, Y_{i_j}(m) \mid X_{i_j}, T_{i_j} = t$ . By writing  $\hat{Y}_{i_{jt}} = Y_{i_{jt}} = \sum_{s=1}^m \mathbb{I} [t = s] Y_{i_{jt}}(s)$ , we see that

$$\begin{aligned} \mathbb{E}[\hat{Y}_{i_j \tau(X_{i_j})}] &= \mathbb{E} \left[ \mathbb{E} \left[ \sum_{s=1}^m \mathbb{I} [s = \tau(X_{i_j})] Y_{i_{jt}}(s) \mid X_{i_j} \right] \right] && \text{(iterated expectation)} \\ &= \sum_{s=1}^m \mathbb{E} \left[ \mathbb{I} [s = \tau(X_{i_j})] \mathbb{E} [Y_{i_{jt}}(s) \mid X_{i_j}] \right] && \text{(linearity)} \\ &= \sum_{s=1}^m \mathbb{E} \left[ \mathbb{I} [s = \tau(X_{i_j})] \mathbb{E} [Y_{i_j}(s) \mid X_{i_j}, T_{i_j} = s] \right] && \text{(exact matching)} \\ &= \sum_{s=1}^m \mathbb{E} \left[ \mathbb{I} [s = \tau(X_{i_j})] \mathbb{E} [Y_{i_j}(s) \mid X_{i_j}] \right] && \text{(Asn. 1)} \\ &= \mathbb{E} \left[ \mathbb{E} \left[ \sum_{s=1}^m \mathbb{I} [s = \tau(X_{i_j})] Y_{i_j}(s) \mid X_{i_j} \right] \right] && \text{(linearity)} \\ &= \mathbb{E} [Y_{i_j}(\tau(X_{i_j}))] && \text{(iterated expectation)} \quad \square \end{aligned}$$
